# Supplementary material for: Synergistic effect of methyljasmonate and cyclodextrin on stilbene biosynthesis pathway gene expression and resveratrol production in Monastrell grapevine cell cultures
Source: PubMed Central journal article supplement (PMC2628674; doi:10.1186/1756-0500-1-132), 2008-12-22

**A**

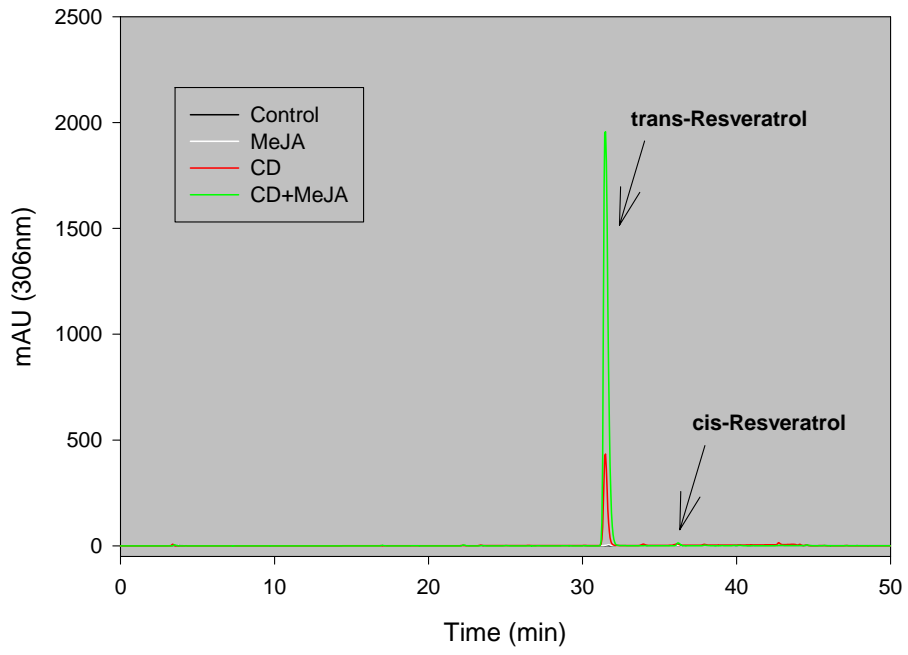

**B**

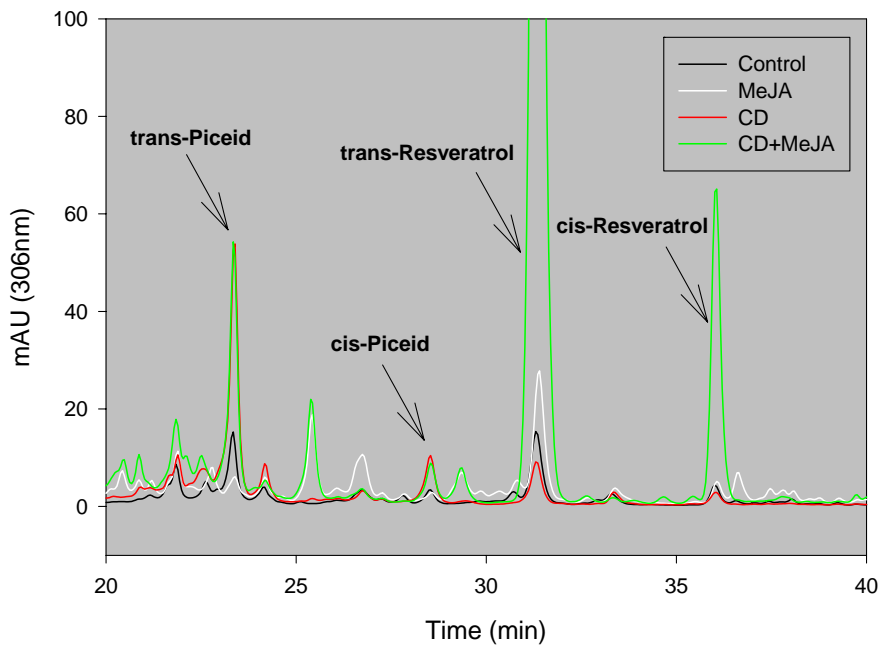

Supplement: 1756-0500-1-132-S2.pdf [file 1756-0500-1-132-S2.pdf]
