# Supplementary material for: Synergistic effect of methyljasmonate and cyclodextrin on stilbene biosynthesis pathway gene expression and resveratrol production in Monastrell grapevine cell cultures
Source: PubMed Central journal article supplement (PMC2628674; doi:10.1186/1756-0500-1-132), 2008-12-22
Supplement: 1756-0500-1-132-S3.pdf [file 1756-0500-1-132-S3.pdf]

|                           | Control     | MeJA        | CD          | CD + MeJA   |
|---------------------------|-------------|-------------|-------------|-------------|
| <i>trans</i> -piceid      | 0.060±0.011 | 0.025±0.003 | 0.266±0.092 | 0.212±0.028 |
| <i>cis</i> -piceid        | 0.017±0.003 | 0.014±0.003 | 0.072±0.012 | 0.041±0.009 |
| <i>trans</i> -resveratrol | 0.040±0.036 | 0.089±0.041 | 0.028±0.018 | 2.160±0.730 |
| <i>cis</i> -resveratrol   | 0.010±0.014 | 0.017±0.006 | 0.013±0.001 | 0.292±0.021 |
| Total stilbenoids         | 0.127±0.033 | 0.145±0.060 | 0.379±0.084 | 2.705±0.737 |
